# Supplementary material for: Development of Ultrahigh Permeance Hollow Fiber Membranes via Simple Surface Coating for CO2/CH4 Separation
Source: MDPI journal article supplement (doi:10.3390/molecules27238381), 2022-12-01
Supplement: s1 [file s1]

### Supplementary Figure

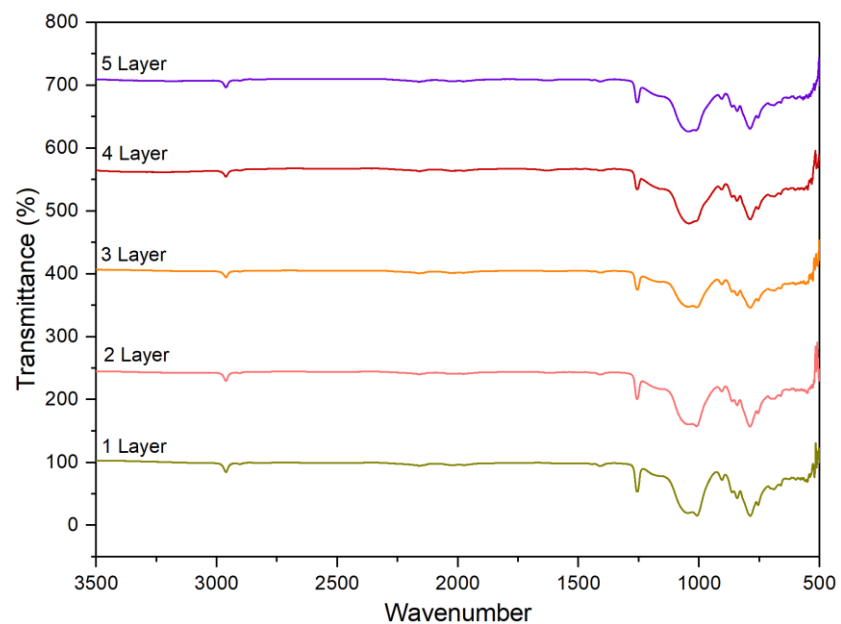

**Figure S1.** Surface chemistry of different TEOS-coated membranes determined by FTIR
